# Supplementary material
Source: ML conference proceedings conference paper supplement (https://proceedings.neurips.cc/paper_files/paper/2010/hash/68053af2923e00204c3ca7c6a3150cf7-Abstract.html)
Supplement: Supplementary file [file 68053af2923e00204c3ca7c6a3150cf7-Supplemental.zip]

## A Proof of Theorem 3.1

*Proof.* Let us assume that  $V_{n-1}(b)$  is a convex function, then we can show that  $V_n(b)$  is also convex as follows. First, the value function in Eq. 1 can be expressed by parts as,

$$\begin{aligned} V_n(b) &= \max_a [V_n^a(b)], \\ V_n^a(b) &= \sum_o V_n^{a,o}(b), \\ V_n^{a,o}(b) &= \frac{\rho(b, a)}{|\Omega|} + \psi^{a,o}(b), \text{ and} \\ \psi^{a,o}(b) &= \gamma Pr(o|a, b) V_{n-1}(b^{a,o}). \end{aligned}$$

Also, using the belief update, we can express  $b^{a,o} = \frac{P^{a,o} \cdot b}{\|P^{a,o} \cdot b\|_1}$  with  $P_{s,s'}^{a,o} = O(s', a, o)T(s, a, s')$ . Therefore,

$$\psi^{a,o}(b) = \gamma \|P^{a,o} \cdot b\|_1 V_{n-1}\left(\frac{P^{a,o} \cdot b}{\|P^{a,o} \cdot b\|_1}\right) = \gamma \kappa(P^{a,o} \cdot b)$$

with  $\kappa(w) = \|w\|_1 V_{n-1}\left(\frac{w}{\|w\|_1}\right)$ .

Here,  $\kappa(w)$  is a convex function as it uses the perspective and linear-fractional convexity preserving operations (see App. A.1 for a stand-alone proof). Then,  $\psi^{a,o}$  is also convex since convexity is preserved under affine maps. Consequently,  $V_n^{a,o}$ ,  $V_n^a$  and  $V_n$  are convex because  $\rho$  and  $\psi^{a,o}$  are convex.<sup>6</sup> Considering this last result is the inductive step, then  $V_n(b)$  is convex over  $b$ , because  $V_0$  is convex by definition.  $\square$

### A.1 Stand-alone Proof of $\kappa$ Convexity

**Lemma A.1.** *Let  $w \in \mathbb{R}^n$  and  $f : \mathbb{R}^n \mapsto \mathbb{R}$  a convex function. If  $\kappa(w) = \|w\|_1 f(\frac{w}{\|w\|_1})$ , then  $\kappa(w)$  is also a convex function.*

*Proof.* As stated before, one can use the perspective and linear-fractional convexity preserving operations to directly prove that  $\kappa$  is convex. However, this can also be proved by only using the convexity of  $f$ :

$$\begin{aligned} &\kappa(\alpha x + (1 - \alpha)y) \\ &= \|\alpha x + (1 - \alpha)y\|_1 f\left(\frac{\alpha x + (1 - \alpha)y}{\|\alpha x + (1 - \alpha)y\|_1}\right) \\ &= \|\alpha x + (1 - \alpha)y\|_1 f\left(\frac{\alpha \|x\|_1}{\|\alpha x + (1 - \alpha)y\|_1} \cdot \frac{x}{\|x\|_1} + \frac{(1 - \alpha)\|y\|_1}{\|\alpha x + (1 - \alpha)y\|_1} \cdot \frac{y}{\|y\|_1}\right) \\ &\leq \|\alpha x + (1 - \alpha)y\|_1 \left(\frac{\alpha \|x\|_1}{\|\alpha x + (1 - \alpha)y\|_1} f\left(\frac{x}{\|x\|_1}\right) + \frac{(1 - \alpha)\|y\|_1}{\|\alpha x + (1 - \alpha)y\|_1} f\left(\frac{y}{\|y\|_1}\right)\right) \\ &= \alpha \|x\|_1 f\left(\frac{x}{\|x\|_1}\right) + (1 - \alpha)\|y\|_1 f\left(\frac{y}{\|y\|_1}\right) \\ &= \alpha \kappa(x) + (1 - \alpha)\kappa(y). \end{aligned}$$

$\square$

---

<sup>6</sup>Convex functions are closed under the sum and the max operators.

## B Proofs of Section 4

### B.1 Proof of Lemma 4.1

*Proof.* The largest minimum distance between the boundaries of both simplices (see Fig. 1) is given by the distance between their closest corners, i.e.,  $\varepsilon' = |(1 - (\mathcal{N} - 1)\varepsilon) - 1| + (\mathcal{N} - 1)|\varepsilon| = 2(\mathcal{N} - 1)\varepsilon$ . This is the worst case scenario for  $\|b' - b''\|_1$ . Then, using the triangular inequality:  $\|b - b''\|_1 \leq \|b - b'\|_1 + \|b' - b''\|_1$ , and picking the highest possible values for both distances, the bound  $\|b - b''\|_1 \leq 2(\mathcal{N} - 1)\varepsilon + \delta_B$  holds.  $\square$

### B.2 Proof of Lemma 4.2

Before proving Lemma 4.2, let us first give an equivalent result in the 1-dimensional case.

**Lemma B.1.** *Let  $x_a, x_b \in \mathbb{R}$  ( $x_a < x_b$ ), and  $\eta \in (0, x_b - x_a)$  be three scalars. Let also  $f$  be a  $\alpha$ -Hölder (with constant  $K_\alpha$ ), bounded and convex function from  $[x_a, x_b]$  to  $\mathbb{R}$ ,  $f$  being differentiable everywhere on  $(x_a, x_b)$ . Then  $f$  is  $K_\alpha \eta^\alpha$ -Lipschitz on  $[x_a + \eta, x_b - \eta]$ .*

*Proof.* With any  $x \in [x_a + \eta, x_b]$  we have (see Fig. 2 for an illustration):

$$\begin{aligned}
 f'(x) &\geq f'(x_a + \eta) && \text{(By convexity of } f\text{)} \\
 &\geq \frac{f(x_a + \eta) - f(x_a)}{\eta} && \text{(For the same reason)} \\
 &\geq -\frac{|f(x_a + \eta) - f(x_a)|}{\eta} \\
 &\geq -K_\alpha \eta^{\alpha-1} && \text{(Because } f \text{ is } \alpha\text{-Hölder).}
 \end{aligned}$$

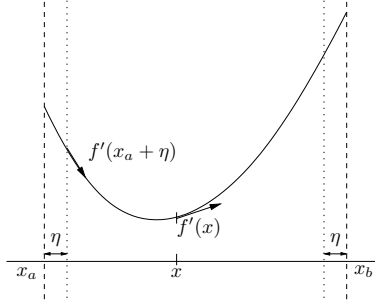

Figure 2: Illustration for the proof of Lemma B.1

Similarly, for any  $x \in [x_a, x_b - \eta]$  we have:

$$\begin{aligned}
 f'(x) &\leq f'(x_b - \eta) \\
 &\leq \frac{f(x_b) - f(x_b - \eta)}{\eta} \\
 &\leq \frac{|f(x_b) - f(x_b - \eta)|}{\eta} \\
 &\leq K_\alpha \eta^{\alpha-1}.
 \end{aligned}$$

Thus, for any  $x \in [x_a + \eta, x_b - \eta]$ ,  $|f'(x)| \leq K_\alpha \eta^{\alpha-1}$ , so that  $f$  is  $K_\alpha \eta^\alpha$ -Lipschitz on  $[x_a + \eta, x_b - \eta]$ .  $\square$

We can now show how the above property extends to an  $n$ -simplex (using any norm).

*Proof of Lemma 4.2.* Let  $b$  be a point in  $\Delta_\eta$  and let  $\mathbf{u}$  be a unit vector parallel to the hyperplane containing  $\Delta$ . As shown on Fig. 3, the line going through  $b$  and directed by  $\mathbf{u}$  intersects  $\Delta$  on the closed segment  $S_{\mathbf{u}} = [b + x_a \mathbf{u}, b + x_b \mathbf{u}]$  ( $x_a < 0 < x_b$ ). We can thus define a function  $g_{\mathbf{u}}$  from  $[x_a, x_b]$  to  $\mathbb{R}$  such that  $g_{\mathbf{u}} : x \mapsto f(b + x \mathbf{u})$ .  $g_{\mathbf{u}}$  is then a  $\alpha$ -Hölder (with same constant), bounded and convex function from  $[x_a, x_b]$  to  $\mathbb{R}$ ,  $g_{\mathbf{u}}$  being differentiable everywhere on  $(x_a, x_b)$ .

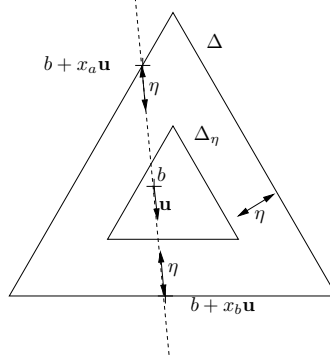

Figure 3: Illustration for the proof of Lemma 4.2

Let us note that the shortest distance (in any norm) between  $\Delta_\eta$  and  $bd(\Delta)$  (the boundary of  $\Delta$ ) is lower bounded by  $\eta$ .<sup>7</sup> The intersection of  $\Delta_\eta$  with  $S_{\mathbf{u}}$  is thus a segment  $S'_{\mathbf{u}} \subseteq [b + (x_a + \eta) \mathbf{u}, b + (x_b - \eta) \mathbf{u}]$ . We can therefore apply Lemma B.1 to  $g_{\mathbf{u}}$  in  $[x_a + \eta, x_b - \eta]$ , what tells us that the derivative of  $g_{\mathbf{u}}$  at point 0 (and therefore the directional derivative of  $f$  at  $b$  along  $\mathbf{u}$ ) is bounded (in absolute value) by  $K_\alpha \eta^{\alpha-1}$ . This property holding for any  $\mathbf{u}$ , we have:

$$\forall b \in \Delta_\eta, \|\nabla f(b)\| \leq K_\alpha \eta^{\alpha-1}.$$

□

The above lemmas naturally extend to the case where  $f$  is piecewise differentiable. Please note that the norm of the gradient of Lemma 4.2 is defined as norm-1 for the uses of this paper, but any  $p$ -norm can be used as stated in the proof.

### B.3 Proof of Theorem 4.3

*Proof.* Let us pick  $b = \operatorname{argmax}_{x \in \Delta} \epsilon_B(x)$ , the point where the approximation  $\omega_B$  presents the worst error. This value can be bounded as follows:

$$\begin{aligned} \epsilon_B(b) &\leq \rho(b) - \omega_{b^*}(b) && \text{(By Eq. 5 and Convexity)} \\ &\leq \rho(b) - \omega_{b''}(b) && (b'' \in B \text{ makes a worse error)} \\ &= \rho(b) - \rho(b'') + (b'' - b) \cdot \nabla \rho(b'') && \text{(By definition of } \omega) \\ &\leq |\rho(b) - \rho(b'')| + |(b'' - b) \cdot \nabla \rho(b'')| && \text{(By triangular inequality)} \\ &\leq K_\alpha \|b - b''\|_1^\alpha + |(b'' - b) \cdot \nabla \rho(b'')| && \text{(By } \alpha\text{-Hölder condition)} \\ &\leq K_\alpha \|b - b''\|_1^\alpha + \|\nabla \rho(b'')\|_\infty \|b'' - b\|_1 && \text{(By Hölder inequality)} \\ &\leq K_\alpha \|b - b''\|_1^\alpha + \|\nabla \rho(b'')\|_1 \|b'' - b\|_1 && \text{(By norm equivalence)} \\ &\leq K_\alpha \|b - b''\|_1^\alpha + K_\alpha \eta^{\alpha-1} \|b'' - b\|_1 && \text{(By Lemma 4.2)} \\ &\leq K_\alpha (2(\mathcal{N} - 1)\varepsilon + \delta_B)^\alpha + K_\alpha \eta^{\alpha-1} (2(\mathcal{N} - 1)\varepsilon + \delta_B) && \text{(By Lemma 4.1)} \\ &= K_\alpha ((2(\mathcal{N} - 1)\varepsilon + \delta_B)^\alpha + (\varepsilon - \delta_B)^{\alpha-1} (2(\mathcal{N} - 1)\varepsilon + \delta_B)) && \text{(By definition of } \eta) \end{aligned}$$

<sup>7</sup>In  $p$ -norm, the distance between  $\Delta_\eta$  and  $bd(\Delta)$  is the distance between the points  $(\eta, \frac{1-\eta}{n-1}, \dots, \frac{1-\eta}{n-1})$  and  $(0, \frac{1}{n-1}, \dots, \frac{1}{n-1})$ , i.e.,  $d(\Delta_\eta, bd(\Delta)) = (\eta^p + (n-1) \frac{\eta^p}{(n-1)^p})^{1/p} = \eta(1 + \frac{1}{(n-1)^{p-1}})^{1/p} \geq \eta$ .

This last result is a generic bound that depends on the choice of  $\varepsilon$ , with  $\varepsilon \in (\delta_B, \frac{1}{\mathcal{N}}]$ . If we define  $\varepsilon$  as a linear function of  $\delta_B$ ,  $\varepsilon = \lambda \delta_B$ , then the generic bound can be written as,

$$\epsilon_B(b) \leq K_\alpha \left[ (2(\mathcal{N} - 1)\lambda + 1)^\alpha + (\lambda - 1)^{\alpha-1} (2(\mathcal{N} - 1)\lambda + 1) \right] \delta_B^\alpha = C \delta_B^\alpha \quad (6)$$

with  $\lambda \in (1, \frac{1}{\delta_B \mathcal{N}}]$ . □
