# Supplementary material
Source: ML conference proceedings conference paper supplement (https://proceedings.neurips.cc/paper_files/paper/2010/hash/68053af2923e00204c3ca7c6a3150cf7-Abstract.html)
Supplement: Supplementary file [file 68053af2923e00204c3ca7c6a3150cf7-Supplemental.zip]

---

# A POMDP Extension with Belief-dependent Rewards (Correction)

---

**Mauricio Araya-López**

**Olivier Buffet**

**Vincent Thomas**

**François Charpillet**

Nancy Université / INRIA  
LORIA – Campus Scientifique – BP 239  
54506 Vandoeuvre-lès-Nancy Cedex – France  
`firstname.lastname@loria.fr`

There is a typo at the end of Section 4.3. The correct formula for the bound of  $\|\hat{V}_t - V_t\|_\infty$  is,

$$\|\hat{V}_t - V_t\|_\infty \leq \frac{(R_{max} - R_{min} + C\delta_B^\alpha)\delta_B}{1 - \gamma}.$$

In the original paper, we have misplaced an  $=$  instead of a  $\leq$ .
